# Supplementary material for: Rapid, quantitative therapeutic screening for Alzheimer's enzymes enabled by optimal signal transduction with transistors
Source: Royal Society of Chemistry journal article supplement (doi:10.1039/c9an01804b), 2020-01-01
Supplement: c9an01804b1.pdf [file c9an01804b1.pdf]

## Label-Free Enzyme Therapeutic Effectiveness Quantification with Optimized Silicon Transistors

Son T. Le<sup>1,2</sup>, Michelle A. Morris<sup>3,^</sup>, Antonio Cardone<sup>4,5</sup>, Nicholas B. Guros<sup>3,6,#</sup>, Jeffery B. Klauda<sup>6</sup>, Brent A. Sperling<sup>7</sup>, Curt A. Richter<sup>1</sup>, Harish C. Pant<sup>8</sup>, and Arvind Balijepalli<sup>3,\*</sup>

<sup>1</sup>Nanoscale Device Characterization Division, National Institute of Standards and Technology, Gaithersburg, MD 20899, USA ; <sup>2</sup>Theiss Research, La Jolla, CA 92037; <sup>3</sup>Microsystems and Nanotechnology Division, National Institute of Standards and Technology, Gaithersburg, MD 20899, USA; <sup>4</sup>Software and Systems Division, National Institute of Standards and Technology, Gaithersburg, MD 20899, USA; <sup>5</sup>University of Maryland Institute for Advanced Computer Studies, University of Maryland, College Park, MD 20742, USA; <sup>6</sup>Department of Chemical and Biomolecular Engineering, University of Maryland, College Park, MD 20742, USA; <sup>7</sup>Chemical Sciences Division, National Institute of Standards and Technology, Gaithersburg, MD 20899, USA; <sup>8</sup>National Institute of Neurological Disorders and Stroke, National Institutes of Health, Bethesda, MD 20892, USA

\*e-mail: arvind.balijepalli@nist.gov

<sup>^</sup>Present address: Virginia Polytechnic Institute and State University, Blacksburg, VA 24061

<sup>#</sup>Present address: Astra Zeneca, 950 Wind River Lane, Gaithersburg, MD 20878

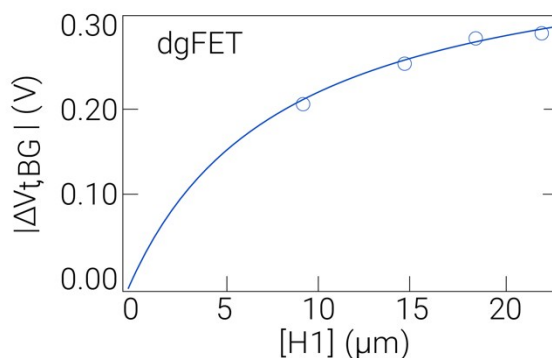

Figure S1: Steady-state measurements of Cdk5 activity using dual-gated field-effect transistors (dgFETs).<sup>1</sup> The change in the solution pH was used as a reporter to detect and quantify enzyme-mediated phosphorylation of the protein histone H1. The change in the back-gate threshold ( $V_{T,BG}$ ) as a function of histone H1 concentration ( $[H1]$ ) showed a monotonic increase. A simple model was used to estimate the activity coefficient,  $k_a=(9.1\pm 0.9)$   $\mu\text{M}$ .<sup>2</sup>

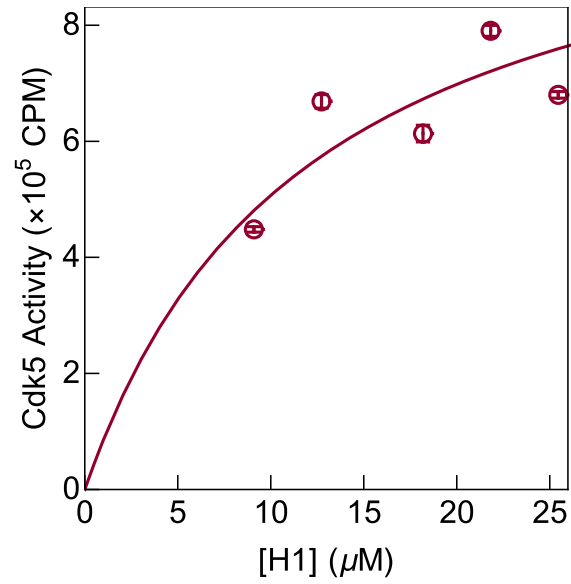

Figure S2: The activity of Cdk5/p25 was determined using a radioactively labeled adenosine triphosphate ( $\gamma$ - $^{32}\text{P}$ -ATP) assay as a function of the concentration of the protein histone ([H1]).<sup>3</sup> A simple model was used to determine the activity coefficient,  $k_a=(12.1\pm 2.3) \mu\text{M}$ .<sup>2</sup> Adapted with permission from Ref. 2. The error bars represent the standard deviation in Cdk5 activity.

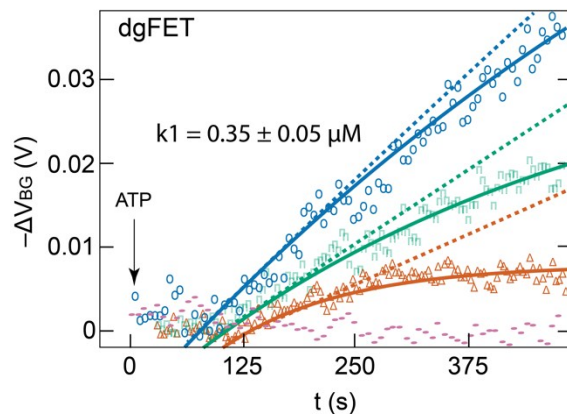

Figure S3: Time-series measurements of enzyme catalyzed phosphorylation of histone H1 were measured with a dual-gated field-effect transistor (dgFET). The histone concentrations ( $[H1]$ ) were  $9.1 \mu\text{M}$  (*orange*),  $12.7 \mu\text{M}$  (*green*),  $18.2 \mu\text{M}$  (*blue*) and a control sample with no histone (*pink*). The solid lines depict a first order kinetics model that describes the time course of phosphorylation, while the dashed lines represent an estimate of the reaction velocity during the first 100 s after a change in the signal was detected.

## References

- 1 N. B. Guros, S. T. Le, S. Zhang, B. A. Sperling, J. B. Klauda, C. A. Richter and A. Balijepalli, *ACS Appl. Mater. Interfaces*, 2019, **11**, 16683–16692.
- 2 S. T. Le, N. B. Guros, R. C. Bruce, A. Cardone, N. D. Amin, S. Zhang, J. B. Klauda, H. C. Pant, C. A. Richter and A. Balijepalli, *Nanoscale*, 2019, **11**, 15622–15632.
- 3 B. K. Binukumar, Y.-L. Zheng, V. Shukla, N. D. Amin, P. Grant and H. C. Pant, *J. Alzheimers Dis.*, 2014, **39**, 899–909.
